# Supplementary material
Source: publisher figshare collection journal article supplement (https://asha.figshare.com/articles/dataset/_/13425968)
Supplement: Supplementary file 1 [file 1]

# Supplementary Materials

## DVAR and DAB Scores

### Changes over time

#### DVAR Composite

Formula: Composite ~ TimePoint \* Grade + (1 | ChildID) + (TimePoint | ClassroomID)

| Fixed Effect       | Estimate | SE   | Std. Estimate | df    | t     | p      |     |
|--------------------|----------|------|---------------|-------|-------|--------|-----|
| Intercept          | 82.38    | 2.02 | 0.26          | 39.88 | 40.88 | <0.001 | *** |
| Time Point         | -4.15    | 1.38 | -0.18         | 42.06 | -3.01 | 0.004  | **  |
| Grade              | -6.59    | 2.88 | -0.28         | 39.65 | -2.29 | 0.027  | *   |
| Time Point x Grade | -4.05    | 1.96 | -0.17         | 41.80 | -2.06 | 0.045  | *   |

#### DVAR Phonology

Formula: Phon ~ TimePoint \* Grade + (1 | ChildID) + (TimePoint | ClassroomID)

| Fixed Effect       | Estimate | SE   | Std. Estimate | df    | t     | p      |     |
|--------------------|----------|------|---------------|-------|-------|--------|-----|
| Intercept          | 85.13    | 1.83 | 0.21          | 43.83 | 46.43 | <0.001 | *** |
| Time Point         | -1.86    | 2.12 | -0.07         | 40.07 | -0.88 | 0.384  |     |
| Grade              | -5.94    | 2.61 | -0.22         | 43.49 | -2.27 | 0.028  | *   |
| Time Point x Grade | -6.69    | 3.02 | -0.25         | 39.78 | -2.22 | 0.032  | *   |

#### DVAR 3sg

Formula: 3SG ~ TimePoint \* Grade + (1 | ChildID) + (TimePoint | ClassroomID)

| Fixed Effect       | Estimate | SE   | Std. Estimate | df    | t     | p      |     |
|--------------------|----------|------|---------------|-------|-------|--------|-----|
| Intercept          | 87.07    | 2.40 | 0.11          | 36.33 | 36.27 | <0.001 | *** |
| Time Point         | -1.42    | 1.80 | -0.05         | 33.01 | -0.79 | 0.433  |     |
| Grade              | -4.63    | 3.42 | -0.16         | 36.12 | -1.35 | 0.185  |     |
| Time Point x Grade | -2.45    | 2.56 | -0.09         | 32.77 | -0.96 | 0.346  |     |

#### DVAR Irregular

Formula: Irreg ~ TimePoint \* Grade + (1 | ChildID) + (TimePoint | ClassroomID)

| Fixed Effect       | Estimate | SE   | Std. Estimate | df    | t     | p      |     |
|--------------------|----------|------|---------------|-------|-------|--------|-----|
| Intercept          | 76.06    | 3.13 | 0.25          | 37.73 | 24.29 | <0.001 | *** |
| Time Point         | -7.26    | 1.89 | -0.21         | 41.04 | -3.83 | <0.001 | *** |
| Grade              | -8.63    | 4.47 | -0.25         | 37.52 | -1.93 | 0.061  | .   |
| Time Point x Grade | -4.33    | 2.70 | -0.13         | 40.72 | -1.60 | 0.117  |     |

### DAB Elicited Imitation

Formula: DAB\_EI ~ TimePoint \* Grade + (1 | ChildID) + (TimePoint | ClassroomID)

| Fixed Effect       | Estimate | SE   | Std. Estimate | df    | t     | p      |     |
|--------------------|----------|------|---------------|-------|-------|--------|-----|
| Intercept          | 16.93    | 0.34 | -0.37         | 43.11 | 49.30 | <0.001 | *** |
| Time Point         | 1.40     | 0.25 | 0.33          | 44.55 | 5.54  | <0.001 | *** |
| Grade              | 1.93     | 0.49 | 0.46          | 42.86 | 3.94  | <0.001 | *** |
| Time Point x Grade | -0.27    | 0.36 | -0.06         | 44.20 | -0.75 | 0.46   |     |

### DAB Translation

Formula: DAB\_TR ~ TimePoint \* Grade + (1 | ChildID) + (TimePoint | ClassroomID)

| Fixed Effect       | Estimate | SE   | Std. Estimate | df     | t     | p      |     |
|--------------------|----------|------|---------------|--------|-------|--------|-----|
| Intercept          | 6.45     | 0.34 | -0.45         | 65.22  | 18.91 | <0.001 | *** |
| Time Point         | 1.47     | 0.35 | 0.29          | 125.54 | 4.20  | <0.001 | *** |
| Grade              | 2.30     | 0.49 | 0.45          | 64.74  | 4.72  | <0.001 | *** |
| Time Point x Grade | 1.65     | 0.50 | 0.32          | 124.68 | 3.31  | 0.001  | **  |

### Dialect change predicting reading

#### DVAR Composite only

Formula: ReadingW-ScorePost ~ ReadingW-ScoreBaseline + CompositeChange + (1 | ClassroomID)

| Fixed Effect             | Estimate | SE   | Std. Estimate | df     | t     | p      |     |
|--------------------------|----------|------|---------------|--------|-------|--------|-----|
| Intercept                | 96.04    | 9.27 | 0.00          | 366.56 | 10.36 | <0.001 | *** |
| Reading W-Score Baseline | 0.82     | 0.02 | 0.85          | 376.32 | 36.27 | <0.001 | *** |
| Composite Change         | -0.15    | 0.04 | -0.08         | 466.96 | -3.97 | <0.001 | *** |

#### DVAR Composite with DAB

Formula: ReadingW-ScorePost ~ ReadingW-ScoreBaseline + CompositeChange + (1 | ClassroomID) + DAB\_EIChange + DAB\_TRChange

| Fixed Effect             | Estimate | SE   | Std. Estimate | df     | t     | p      |     |
|--------------------------|----------|------|---------------|--------|-------|--------|-----|
| Intercept                | 98.02    | 9.34 | 0.00          | 367.83 | 10.50 | <0.001 | *** |
| Reading W-Score Baseline | 0.81     | 0.02 | 0.84          | 378.42 | 35.58 | <0.001 | *** |
| Composite Change         | -0.14    | 0.04 | -0.08         | 464.84 | -3.81 | <0.001 | *** |
| DAB_EI Change            | -0.25    | 0.17 | -0.03         | 456.90 | -1.50 | 0.133  |     |
| DAB_TR Change            | 0.22     | 0.12 | 0.04          | 445.55 | 1.86  | 0.064  | .   |

### DVAR subscores only

Formula: ReadingW-ScorePost ~ ReadingW-ScoreBaseline + PhonChange + 3SGChange + IrregChange + (1 | ClassroomID)

| Fixed Effect             | Estimate | SE   | Std. Estimate | df     | t     | p      |     |
|--------------------------|----------|------|---------------|--------|-------|--------|-----|
| Intercept                | 96.05    | 9.29 | 0.00          | 363.54 | 10.34 | <0.001 | *** |
| Reading W-Score Baseline | 0.82     | 0.02 | 0.85          | 373.40 | 36.19 | <0.001 | *** |
| Phon Change              | -0.07    | 0.02 | -0.06         | 461.58 | -2.93 | 0.004  | **  |
| 3SG Change               | -0.02    | 0.03 | -0.02         | 460.98 | -0.85 | 0.394  |     |
| Irreg Change             | -0.06    | 0.02 | -0.05         | 456.40 | -2.54 | 0.011  | *   |

### DVAR subscores with DAB

Formula: ReadingW-ScorePost ~ ReadingW-ScoreBaseline + PhonChange + 3SGChange + IrregChange + (1 | ClassroomID) + DAB\_EIChange + DAB\_TRChange

| Fixed Effect             | Estimate | SE   | Std. Estimate | df     | t     | p      |     |
|--------------------------|----------|------|---------------|--------|-------|--------|-----|
| Intercept                | 97.93    | 9.36 | 0.00          | 364.12 | 10.46 | <0.001 | *** |
| Reading W-Score Baseline | 0.81     | 0.02 | 0.84          | 374.68 | 35.50 | <0.001 | *** |
| Phon Change              | -0.06    | 0.02 | -0.06         | 460.00 | -2.84 | 0.005  | **  |
| 3SG Change               | -0.02    | 0.03 | -0.02         | 459.52 | -0.86 | 0.388  |     |
| Irreg Change             | -0.06    | 0.02 | -0.05         | 454.84 | -2.37 | 0.018  | *   |
| DAB_EI Change            | -0.25    | 0.17 | -0.03         | 455.01 | -1.49 | 0.137  |     |
| DAB_TR Change            | 0.21     | 0.12 | 0.04          | 444.32 | 1.77  | 0.078  | .   |

### Baseline dialect predicting reading

#### DVAR Composite only

Formula: ReadingW-ScorePost ~ ReadingW-ScoreBaseline + CompositeBaseline

+ (1 | ClassroomID)

| Fixed Effect             | Estimate | SE    | Std. Estimate | df     | t     | p      |     |
|--------------------------|----------|-------|---------------|--------|-------|--------|-----|
| Intercept                | 105.93   | 11.03 | 0.00          | 434.75 | 9.60  | <0.001 | *** |
| Reading W-Score Baseline | 0.81     | 0.02  | 0.84          | 406.47 | 33.48 | <0.001 | *** |
| Composite Baseline       | -0.07    | 0.03  | -0.05         | 466.25 | -2.11 | 0.036  | *   |

### DVAR Composite with DAB

Formula: ReadingW-ScorePost ~ ReadingW-ScoreBaseline + CompositeBaseline  
+ (1 | ClassroomID) + DAB\_EIBaseline + DAB\_TRBaseline

| Fixed Effect             | Estimate | SE    | Std. Estimate | df     | t     | p      |     |
|--------------------------|----------|-------|---------------|--------|-------|--------|-----|
| Intercept                | 97.63    | 10.91 | 0.00          | 426.53 | 8.95  | <0.001 | *** |
| Reading W-Score Baseline | 0.79     | 0.02  | 0.81          | 416.19 | 32.62 | <0.001 | *** |
| Composite Baseline       | -0.02    | 0.03  | -0.01         | 464.17 | -0.52 | 0.601  |     |
| DAB_EI Baseline          | 0.66     | 0.16  | 0.10          | 460.16 | 4.23  | <0.001 | *** |
| DAB_TR Baseline          | 0.23     | 0.15  | 0.03          | 453.63 | 1.52  | 0.13   |     |

### DVAR subscores only

Formula: ReadingW-ScorePost ~ ReadingW-ScoreBaseline + (DELV\_Prop\_PhonBaseline  
+ 3SGBaseline + DELV\_Prop\_Aux)Baseline + (1 | ClassroomID)

| Fixed Effect             | Estimate | SE    | Std. Estimate | df     | t     | p      |     |
|--------------------------|----------|-------|---------------|--------|-------|--------|-----|
| Intercept                | 104.01   | 11.20 | 0.00          | 436.93 | 9.29  | <0.001 | *** |
| Reading W-Score Baseline | 0.81     | 0.02  | 0.84          | 408.22 | 33.39 | <0.001 | *** |
| Phon Baseline            | 0.00     | 0.03  | 0.00          | 453.62 | 0.14  | 0.888  |     |
| 3SG Baseline             | -0.03    | 0.03  | -0.03         | 462.25 | -0.97 | 0.334  |     |
| Irreg Baseline           | -0.03    | 0.03  | -0.03         | 463.39 | -1.21 | 0.226  |     |

### DVAR subscores with DAB

Formula: ReadingW-ScorePost ~ ReadingW-ScoreBaseline + PhonBaseline  
+ 3SGBaseline + IrregBaseline + (1 | ClassroomID) + DAB\_EIBaseline  
+ DAB\_TRBaseline

| Fixed Effect             | Estimate | SE    | Std. Estimate | df     | t     | p      |     |
|--------------------------|----------|-------|---------------|--------|-------|--------|-----|
| Intercept                | 96.38    | 11.05 | 0.00          | 428.92 | 8.72  | <0.001 | *** |
| Reading W-Score Baseline | 0.79     | 0.02  | 0.82          | 417.87 | 32.47 | <0.001 | *** |
| Phon Baseline            | 0.01     | 0.03  | 0.01          | 452.41 | 0.43  | 0.667  |     |
| 3SG Baseline             | -0.01    | 0.03  | -0.01         | 461.85 | -0.45 | 0.653  |     |

| Fixed Effect    | Estimate | SE   | Std. Estimate | df     | t     | p      |     |
|-----------------|----------|------|---------------|--------|-------|--------|-----|
| Irreg Baseline  | -0.01    | 0.03 | -0.01         | 462.58 | -0.35 | 0.73   |     |
| DAB_EI Baseline | 0.65     | 0.16 | 0.10          | 457.96 | 4.17  | <0.001 | *** |
| DAB_TR Baseline | 0.23     | 0.15 | 0.03          | 451.75 | 1.52  | 0.13   |     |

## Factor Scores

### Changes over time

#### DELV Phonology

Formula: DELV-Phon ~ TimePoint \* Grade + (1 | ChildID) + (TimePoint | ClassroomID)

| Fixed Effect       | Estimate | SE   | Std. Estimate | df    | t     | p     |    |
|--------------------|----------|------|---------------|-------|-------|-------|----|
| Intercept          | 0.04     | 0.05 | 0.30          | 43.40 | 0.73  | 0.468 |    |
| Time Point         | -0.09    | 0.05 | -0.15         | 40.87 | -1.88 | 0.067 | .  |
| Grade              | -0.21    | 0.07 | -0.33         | 43.14 | -2.86 | 0.006 | ** |
| Time Point x Grade | -0.15    | 0.07 | -0.24         | 40.62 | -2.08 | 0.044 | *  |

#### DELV 3sg

Formula: DELV-3sg ~ TimePoint \* Grade + (1 | ChildID) + (TimePoint | ClassroomID)

| Fixed Effect       | Estimate | SE   | Std. Estimate | df    | t     | p      |     |
|--------------------|----------|------|---------------|-------|-------|--------|-----|
| Intercept          | 0.03     | 0.06 | 0.27          | 40.97 | 0.52  | 0.605  |     |
| Time Point         | -0.14    | 0.04 | -0.21         | 42.24 | -3.68 | <0.001 | *** |
| Grade              | -0.23    | 0.09 | -0.34         | 40.75 | -2.54 | 0.015  | *   |
| Time Point x Grade | -0.05    | 0.05 | -0.07         | 41.92 | -0.86 | 0.396  |     |

#### DELV Irregular

Formula: DELV-Irreg ~ TimePoint \* Grade + (1 | ChildID) + (TimePoint | ClassroomID)

| Fixed Effect       | Estimate | SE   | Std. Estimate | df    | t     | p      |     |
|--------------------|----------|------|---------------|-------|-------|--------|-----|
| Intercept          | 0.07     | 0.06 | 0.30          | 40.59 | 1.22  | 0.231  |     |
| Time Point         | -0.17    | 0.04 | -0.26         | 43.63 | -4.52 | <0.001 | *** |
| Grade              | -0.22    | 0.09 | -0.34         | 40.37 | -2.55 | 0.015  | *   |
| Time Point x Grade | -0.05    | 0.05 | -0.07         | 43.34 | -0.92 | 0.364  |     |

### DAB Elicited Imitation

Formula: DAB-EI ~ TimePoint \* Grade + (1 | ChildID) + (TimePoint | ClassroomID)

| Fixed Effect       | Estimate | SE   | Std. Estimate | df     | t     | p      |     |
|--------------------|----------|------|---------------|--------|-------|--------|-----|
| Intercept          | 0.18     | 0.04 | 0.43          | 44.42  | 5.03  | <0.001 | *** |
| Time Point         | -0.16    | 0.02 | -0.36         | 205.65 | -7.39 | <0.001 | *** |
| Grade              | -0.22    | 0.05 | -0.49         | 44.15  | -4.38 | <0.001 | *** |
| Time Point x Grade | -0.01    | 0.03 | -0.02         | 204.47 | -0.32 | 0.751  |     |

### DAB Translation

Formula: DAB-TR ~ TimePoint \* Grade + (1 | ChildID) + (TimePoint | ClassroomID)

| Fixed Effect       | Estimate | SE   | Std. Estimate | df    | t     | p      |     |
|--------------------|----------|------|---------------|-------|-------|--------|-----|
| Intercept          | 0.14     | 0.04 | 0.49          | 41.12 | 3.94  | <0.001 | *** |
| Time Point         | -0.17    | 0.03 | -0.36         | 42.02 | -5.54 | <0.001 | *** |
| Grade              | -0.24    | 0.05 | -0.49         | 40.85 | -4.66 | <0.001 | *** |
| Time Point x Grade | -0.13    | 0.04 | -0.27         | 41.66 | -2.90 | 0.006  | **  |

### Dialect change predicting reading

#### DELV factor scores only

Formula: ReadingW-ScorePost ~ ReadingW-ScoreBaseline + DELV-PhonChange + DELV-IrregChange + DELV-3sgChange + (1 | ClassroomID)

| Fixed Effect             | Estimate | SE   | Std. Estimate | df     | t     | p      |     |
|--------------------------|----------|------|---------------|--------|-------|--------|-----|
| Intercept                | 93.94    | 9.37 | 0.00          | 366.05 | 10.02 | <0.001 | *** |
| Reading W-Score Baseline | 0.83     | 0.02 | 0.85          | 375.37 | 36.17 | <0.001 | *** |
| DELV-Phon Change         | -2.68    | 1.05 | -0.06         | 462.84 | -2.54 | 0.011  | *   |
| DELV-Irreg Change        | -1.81    | 2.00 | -0.03         | 459.34 | -0.91 | 0.365  |     |
| DELV-3sg Change          | 1.43     | 1.79 | 0.03          | 455.76 | 0.80  | 0.425  |     |

#### DELV and DAB factor scores

Formula: ReadingW-ScorePost ~ ReadingW-ScoreBaseline + DELV-PhonChange + DELV-IrregChange + DELV-3sgChange + DAB-EIChange + DAB-TRChange + (1 | ClassroomID)

| Fixed Effect             | Estimate | SE   | Std. Estimate | df     | t     | p      |     |
|--------------------------|----------|------|---------------|--------|-------|--------|-----|
| Intercept                | 94.33    | 9.46 | 0.00          | 364.80 | 9.97  | <0.001 | *** |
| Reading W-Score Baseline | 0.82     | 0.02 | 0.85          | 374.77 | 35.64 | <0.001 | *** |
| DELV-Phon Change         | -2.54    | 1.08 | -0.05         | 458.89 | -2.35 | 0.019  | *   |
| DELV-Irreg Change        | -1.85    | 2.05 | -0.03         | 455.45 | -0.90 | 0.367  |     |
| DELV-3sg Change          | 1.49     | 1.82 | 0.03          | 454.23 | 0.82  | 0.411  |     |
| DAB-EI Change            | 0.64     | 2.24 | 0.01          | 447.22 | 0.29  | 0.775  |     |
| DAB-TR Change            | -0.94    | 1.55 | -0.01         | 446.35 | -0.61 | 0.543  |     |

### Baseline dialect predicting reading

#### DELV factor scores

Formula: ReadingW-ScorePost ~ ReadingW-ScoreBaseline + DELV-PhonBaseline + DELV-IrregBaseline + DELV-3sgBaseline + (1 | ClassroomID)

| Fixed Effect             | Estimate | SE   | Std. Estimate | df     | t     | p      |     |
|--------------------------|----------|------|---------------|--------|-------|--------|-----|
| Intercept                | 105.34   | 9.99 | 0.00          | 400.32 | 10.55 | <0.001 | *** |
| Reading W-Score Baseline | 0.80     | 0.02 | 0.83          | 407.05 | 32.76 | <0.001 | *** |
| DELV-Phon Baseline       | 0.19     | 1.28 | 0.00          | 460.11 | 0.15  | 0.88   |     |
| DELV-Irreg Baseline      | -2.70    | 2.44 | -0.06         | 459.53 | -1.11 | 0.269  |     |
| DELV-3sg Baseline        | -1.66    | 2.25 | -0.04         | 456.88 | -0.74 | 0.461  |     |

#### DELV factor (drop Irreg)

Formula: ReadingW-ScorePost ~ ReadingW-ScoreBaseline + DELV-PhonBaseline + DELV-3sgBaseline + (1 | ClassroomID)

| Fixed Effect             | Estimate | SE   | Std. Estimate | df     | t     | p      |     |
|--------------------------|----------|------|---------------|--------|-------|--------|-----|
| Intercept                | 104.55   | 9.96 | 0.00          | 402.38 | 10.50 | <0.001 | *** |
| Reading W-Score Baseline | 0.80     | 0.02 | 0.83          | 409.81 | 32.89 | <0.001 | *** |
| DELV-Phon Baseline       | 0.00     | 1.26 | 0.00          | 458.90 | 0.00  | 0.999  |     |
| DELV-3sg Baseline        | -3.79    | 1.14 | -0.08         | 467.73 | -3.32 | <0.001 | *** |

#### DELV factor (drop 3sg)

Formula: ReadingW-ScorePost ~ ReadingW-ScoreBaseline + DELV-PhonBaseline + DELV-IrregBaseline + (1 | ClassroomID)

| Fixed Effect             | Estimate | SE   | Std. Estimate | df     | t     | p      |     |
|--------------------------|----------|------|---------------|--------|-------|--------|-----|
| Intercept                | 105.17   | 9.97 | 0.00          | 399.47 | 10.55 | <0.001 | *** |
| Reading W-Score Baseline | 0.80     | 0.02 | 0.83          | 406.24 | 32.83 | <0.001 | *** |

| Fixed Effect        | Estimate | SE   | Std. Estimate | df     | t     | p      |     |
|---------------------|----------|------|---------------|--------|-------|--------|-----|
| DELV-Phon Baseline  | 0.09     | 1.27 | 0.00          | 462.19 | 0.07  | 0.941  |     |
| DELV-Irreg Baseline | -4.26    | 1.24 | -0.09         | 469.57 | -3.44 | <0.001 | *** |

### DELV and DAB factor scores

Formula: ReadingW-ScorePost ~ ReadingW-ScoreBaseline + DELV-PhonBaseline + DELV-IrregBaseline + DELV-3sgBaseline + DAB-EIBaseline + DAB-TRBaseline + (1 | ClassroomID)

| Fixed Effect             | Estimate | SE   | Std. Estimate | df     | t     | p      |     |
|--------------------------|----------|------|---------------|--------|-------|--------|-----|
| Intercept                | 111.71   | 9.99 | 0.00          | 415.31 | 11.18 | <0.001 | *** |
| Reading W-Score Baseline | 0.78     | 0.02 | 0.81          | 419.88 | 32.28 | <0.001 | *** |
| DELV-Phon Baseline       | 1.16     | 1.31 | 0.02          | 455.57 | 0.89  | 0.375  |     |
| DELV-Irreg Baseline      | -1.35    | 2.44 | -0.03         | 457.67 | -0.55 | 0.581  |     |
| DELV-3sg Baseline        | 0.79     | 2.31 | 0.02          | 454.87 | 0.34  | 0.732  |     |
| DAB-EI Baseline          | -6.39    | 2.35 | -0.09         | 454.62 | -2.71 | 0.007  | **  |
| DAB-TR Baseline          | -3.28    | 2.00 | -0.05         | 455.44 | -1.64 | 0.102  |     |

## Repertoire

### Changes over time

#### Overt copula

Formula: DAB-Copula ~ TimePoint \* Grade + (1 | ChildID) + (1 | ClassroomID)

| Fixed Effect       | Estimate | SE   | Std. Estimate | z     | p      |     |
|--------------------|----------|------|---------------|-------|--------|-----|
| Intercept          | -0.84    | 0.17 | -0.84         | -5.02 | <0.001 | *** |
| Time Point         | 0.91     | 0.20 | 0.91          | 4.50  | <0.001 | *** |
| Grade              | 0.90     | 0.23 | 0.90          | 3.93  | <0.001 | *** |
| Time Point x Grade | -0.12    | 0.28 | -0.12         | -0.44 | 0.659  |     |

#### Overt past tense

Formula: DAB-Past ~ TimePoint \* Grade + (1 | ChildID) + (1 | ClassroomID)

| Fixed Effect | Estimate | SE   | Std. Estimate | z    | p     |
|--------------|----------|------|---------------|------|-------|
| Intercept    | 0.01     | 0.14 | 0.01          | 0.06 | 0.949 |
| Time Point   | 0.05     | 0.19 | 0.05          | 0.28 | 0.776 |



| Fixed Effect       | Estimate | SE   | Std. Estimate | z     | p     |
|--------------------|----------|------|---------------|-------|-------|
| Grade              | 0.18     | 0.20 | 0.18          | 0.89  | 0.374 |
| Time Point x Grade | -0.09    | 0.27 | -0.09         | -0.34 | 0.736 |

### Overt possessive

Formula: DAB-Possessive ~ TimePoint \* Grade + (1 | ChildID) + (1 | ClassroomID)

| Fixed Effect       | Estimate | SE   | Std. Estimate | z     | p      |     |
|--------------------|----------|------|---------------|-------|--------|-----|
| Intercept          | -1.69    | 0.23 | -1.69         | -7.31 | <0.001 | *** |
| Time Point         | -0.16    | 0.25 | -0.16         | -0.62 | 0.533  |     |
| Grade              | 0.02     | 0.30 | 0.02          | 0.05  | 0.957  |     |
| Time Point x Grade | 1.02     | 0.34 | 1.02          | 2.97  | 0.003  | **  |

### DELV Phonology

Formula: DELV-Phon ~ TimePoint \* Grade + (1 | ChildID) + (1 | ClassroomID)

| Fixed Effect       | Estimate | SE   | Std. Estimate | z     | p     |   |
|--------------------|----------|------|---------------|-------|-------|---|
| Intercept          | -0.31    | 0.15 | -0.31         | -2.02 | 0.043 | * |
| Time Point         | 0.04     | 0.19 | 0.04          | 0.19  | 0.846 |   |
| Grade              | 0.38     | 0.22 | 0.38          | 1.75  | 0.081 | . |
| Time Point x Grade | 0.47     | 0.28 | 0.47          | 1.70  | 0.090 | . |

### DELV Irregular

Formula: DELV-Irreg ~ TimePoint \* Grade + (1 | ChildID) + (1 | ClassroomID)

| Fixed Effect       | Estimate | SE   | Std. Estimate | z    | p     |   |
|--------------------|----------|------|---------------|------|-------|---|
| Intercept          | 0.09     | 0.23 | 0.09          | 0.40 | 0.686 |   |
| Time Point         | 0.29     | 0.21 | 0.29          | 1.37 | 0.170 |   |
| Grade              | 0.56     | 0.33 | 0.56          | 1.73 | 0.084 | . |
| Time Point x Grade | 0.40     | 0.31 | 0.40          | 1.32 | 0.188 |   |

### DELV 3sg

Formula: DELV-3sg ~ TimePoint \* Grade + (1 | ChildID) + (1 | ClassroomID)

| Fixed Effect       | Estimate | SE   | Std. Estimate | z     | p          |
|--------------------|----------|------|---------------|-------|------------|
| Intercept          | -1.57    | 0.27 | -1.57         | -5.86 | <0.001 *** |
| Time Point         | 0.30     | 0.25 | 0.30          | 1.22  | 0.221      |
| Grade              | 0.61     | 0.34 | 0.61          | 1.81  | 0.071 .    |
| Time Point x Grade | -0.03    | 0.34 | -0.03         | -0.07 | 0.941      |

### Dialect change predicting reading

#### DELV only

Formula: ReadingW-ScorePost ~ ReadingW-ScoreBaseline + DELV-PhonChange + DELV-3sgChange + DELV-IrregChange + (1 | ClassroomID)

| Fixed Effect             | Estimate | SE   | Std. Estimate | df     | t     | p          |
|--------------------------|----------|------|---------------|--------|-------|------------|
| Intercept                | 94.62    | 9.46 | 0.00          | 369.82 | 10.00 | <0.001 *** |
| Reading W-Score Baseline | 0.82     | 0.02 | 0.85          | 378.24 | 35.83 | <0.001 *** |
| DELV-Phon Change         | 1.02     | 0.97 | 0.02          | 457.29 | 1.05  | 0.295      |
| DELV-3sg Change          | 0.39     | 1.21 | 0.01          | 450.15 | 0.32  | 0.746      |
| DELV-Irreg Change        | 0.81     | 1.10 | 0.02          | 458.79 | 0.73  | 0.463      |

#### DELV and DAB

Formula: ReadingW-ScorePost ~ ReadingW-ScoreBaseline + DAB-CopulaChange + DAB-PossessiveChange + DELV-PhonChange + DELV-3sgChange + DELV-IrregChange + (1 | ClassroomID)

| Fixed Effect             | Estimate | SE   | Std. Estimate | df     | t     | p          |
|--------------------------|----------|------|---------------|--------|-------|------------|
| Intercept                | 94.60    | 9.50 | 0.00          | 373.82 | 9.96  | <0.001 *** |
| Reading W-Score Baseline | 0.82     | 0.02 | 0.85          | 382.94 | 35.57 | <0.001 *** |
| DAB-Copula Change        | 1.08     | 1.34 | 0.02          | 449.82 | 0.80  | 0.421      |
| DAB-Possessive Change    | 0.80     | 1.64 | 0.01          | 455.05 | 0.48  | 0.629      |
| DELV-Phon Change         | 1.00     | 0.98 | 0.02          | 455.14 | 1.02  | 0.306      |
| DELV-3sg Change          | 0.46     | 1.21 | 0.01          | 449.09 | 0.38  | 0.702      |
| DELV-Irreg Change        | 0.74     | 1.11 | 0.01          | 456.95 | 0.66  | 0.507      |

### Baseline dialect predicting reading

#### DELV only

Formula: ReadingW-ScorePost ~ ReadingW-ScoreBaseline + DELV-PhonBaseline + DELV-3sgBaseline + DELV-IrregBaseline + (1 | ClassroomID)

| Fixed Effect             | Estimate | SE   | Std. Estimate | df     | t     | p      |     |
|--------------------------|----------|------|---------------|--------|-------|--------|-----|
| Intercept                | 97.48    | 9.52 | 0.00          | 371.77 | 10.24 | <0.001 | *** |
| Reading W-Score Baseline | 0.81     | 0.02 | 0.84          | 392.63 | 34.29 | <0.001 | *** |
| DELV-Phon Baseline       | 0.52     | 1.28 | 0.01          | 456.00 | 0.41  | 0.685  |     |
| DELV-3sg Baseline        | 1.01     | 1.47 | 0.02          | 457.05 | 0.69  | 0.492  |     |
| DELV-Irreg Baseline      | 2.87     | 1.37 | 0.05          | 460.02 | 2.09  | 0.037  | *   |

### DELV and DAB

Formula: ReadingW-ScorePost ~ ReadingW-ScoreBaseline + DELV-PhonBaseline + DELV-3sgBaseline + DELV-IrregBaseline + DAB-CopulaBaseline + DAB-PossessiveBaseline + (1 | ClassroomID)

| Fixed Effect             | Estimate | SE   | Std. Estimate | df     | t     | p      |     |
|--------------------------|----------|------|---------------|--------|-------|--------|-----|
| Intercept                | 100.51   | 9.42 | 0.00          | 368.77 | 10.67 | <0.001 | *** |
| Reading W-Score Baseline | 0.80     | 0.02 | 0.83          | 392.83 | 33.97 | <0.001 | *** |
| DELV-Phon Baseline       | 0.07     | 1.27 | 0.00          | 455.03 | 0.05  | 0.957  |     |
| DELV-3sg Baseline        | 0.80     | 1.46 | 0.01          | 455.28 | 0.55  | 0.583  |     |
| DELV-Irreg Baseline      | 2.43     | 1.36 | 0.04          | 458.93 | 1.78  | 0.075  | .   |
| DAB-Copula Baseline      | 4.59     | 1.29 | 0.08          | 448.06 | 3.56  | <0.001 | *** |
| DAB-Possessive Baseline  | 1.85     | 1.63 | 0.02          | 464.03 | 1.14  | 0.256  |     |
